# Supplementary material for: Multiple phase rifting and subsequent inversion in the West Netherlands Basin: implications for geothermal reservoir characterization
Source: Copernicus journal article supplement (doi:10.5194/egusphere-2023-1126), 2023-06-13
Supplement: Supplementary file 1 [file List of used wells.xlsx]

## Sheet: Blad1
Name	Coordinates (RD new)		Coordinates (WGS 84)		Result	LAS-file available for whole well?	Inside study area?
	X	Y	Latitude	Longitude
BEN-01	98249	454299	52.0741	4.55942	Dry	No	No
BRK-01	90641	442389	51.9662	4.4507	Failure	No	Yes
BRK-01-S1	90641	442389	51.9662	4.4507	Oil	No	Yes
BRK-02	90710	442155	51.9641	4.45174	Oil	No	Yes
BRK-03	91711	442155	51.9642	4.46631	Oil	Partly	Yes
BRK-04	91342	440872	51.9526	4.46118	Oil	Yes	Yes
BRK-04-S1	91342	440872	51.9526	4.46118	Oil	No	Yes
BRK-05	91344	440867	51.9526	4.46121	Dry	Yes	Yes
BRK-05-S1	91344	440867	51.9526	4.46121	Failure	No	Yes
BRK-05-S2	91344	440867	51.9526	4.46121	Oil	Yes	Yes
BRK-05-S3	91344	440867	51.9526	4.46121	Oil	No	Yes
BRK-06	91345	440863	51.9526	4.46122	Failure	Yes	Yes
BRK-07	91347	440858	51.9525	4.46125	Oil	No	Yes
BRK-08	91349	440853	51.9525	4.46128	Failure	No	Yes
BRK-08-S1	91349	440853	51.9525	4.46128	Dry	Yes	Yes
BRK-08-S2	91349	440853	51.9525	4.46128	Dry	Yes	Yes
BRK-09	91350	440848	51.9524	4.4613	Oil	Yes	Yes
BRK-10	91339	440882	51.9527	4.46113	Oil	Yes	Yes
BRK-11	91340	440877	51.9527	4.46115	Dry	Yes	Yes
BRK-12	91337	440886	51.9528	4.4611	Oil	Yes	Yes
BRK-13	91363	440962	51.9535	4.46147	Oil	Yes	Yes
BRK-14	91363	440972	51.9535	4.46146	Oil	Yes	Yes
BRK-15	91363	440982	51.9536	4.46146	Oil	Yes	Yes
BRK-16	91362	440942	51.9533	4.46146	Oil	No	Yes
BRK-16-S1	91362	440942	51.9533	4.46146	Oil	Yes	Yes
BRK-17	91364	441032	51.9541	4.46147	Oil	Yes	Yes
BRK-18	91364	441012	51.9539	4.46147	Oil	Partly	Yes
BRK-19	91364	441002	51.9538	4.46147	Oil	Yes	Yes
BRK-20	91362	440922	51.9531	4.46146	Oil	Partly	Yes
BRK-21	91364	441027	51.954	4.46147	Oil	Partly	Yes
BRK-21-S1	91364	441027	51.954	4.46147	Oil	Yes	Yes
BRK-22	91364	440957	51.9534	4.46148	Oil	Yes	Yes
BRK-23	91361	440892	51.9528	4.46145	Oil	Yes	Yes
BRK-24	91363	440987	51.9537	4.46146	Oil	No	Yes
BRK-25	91363	440977	51.9536	4.46146	Oil	No	Yes
BRK-26	91361	440897	51.9529	4.46145	Oil	No	Yes
BRT-01	94682	428862	51.8451	4.51186	Oil & gas	Yes	Yes
BRTZ-01	97501	428547	51.8425	4.55282	Gas	Yes	Yes
BSKP-01	104546	456405	52.0936	4.65095	Failure	No	No
BSKP-01-S1	104546	456405	52.0936	4.65095	Gas	No	No
BTL-01	81928	431631	51.8684	4.32622	Gas	Yes	Yes
CAP-01	99250	441507	51.9592	4.5761	Oil	Yes	Yes
DEL-01	83005	448319	52.0185	4.33835	Gas	Yes	Yes
DEL-02	83366	447765	52.0136	4.34373	Oil	Yes	Yes
DEL-03	84248	446176	51.9994	4.3569	Oil	Partly	Yes
DEL-04	84164	446369	52.0012	4.35564	Oil	Yes	Yes
DEL-05	83181	447840	52.0143	4.34102	Gas	Partly	Yes
DEL-05-S1	83181	447840	52.0143	4.34102	Oil	Partly	Yes
DEL-06	82735	446916	52.0059	4.33472	Oil	Partly	Yes
DEL-07	85076	446483	52.0023	4.3689	Oil	Partly	Yes
DEL-08	85487	445771	51.996	4.37502	Oil	Yes	Yes
DRT-01	108933	425656	51.8176	4.71909	Dry	Yes	Yes
GAG-01	75888	441184	51.9535	4.23634	Dry	Yes	Yes
GAG-02	75893	441187	51.9535	4.23641	Failure	No	Yes
GAG-02-S1	75893	441187	51.9535	4.23641	Gas	Yes	Yes
GAG-03	75864	441179	51.9534	4.23599	Gas	No	Yes
GAG-04	75897	441172	51.9534	4.23647	Gas	No	Yes
GAG-05	75868	441164	51.9533	4.23605	Gas	Yes	Yes
GAG-06	75837	441171	51.9533	4.2356	Failure	No	Yes
GAG-06-S1	75837	441171	51.9533	4.2356	Gas	No	Yes
GOU-01	101158	455107	52.0816	4.60172	Dry	Yes	No
GOU-02	114230	446705	52.0072	4.79341	Dry	No	No
GSD-01	115419	426290	51.8238	4.81308	Dry	Yes	Yes
HAG-01	77113	452159	52.0523	4.25166	Dry	Yes	No
HAG-02	76209	455165	52.0791	4.23779	Dry	Yes	No
HEI-01	94051	426796	51.8264	4.50307	Dry	Yes	Yes
HST-01	113475	445258	51.9942	4.78259	Dry	No	No
HST-02	113876	445040	51.9922	4.78846	Dry	Yes	No
HST-02-S1	113876	445040	51.9922	4.78846	Gas	Yes	No
HZW-01	101220	455688	52.0868	4.60253	Dry	Partly	No
IJS-64-S2	95615	435214	51.9023	4.52431	Dry	Yes	Yes
KDZ-01	70806	455314	52.0797	4.15895	Dry	Yes	No
KDZ-02	71043	454391	52.0714	4.16263	Failure	No	No
KDZ-02-S1	71043	454391	52.0714	4.16263	Gas	Yes	No
LED-01	87795	453566	52.0663	4.4071	Dry	No	Yes
LED-02	87180	453807	52.0684	4.39808	Gas	No	Yes
LED-03	88667	456781	52.0953	4.41919	Dry	Yes	Yes
LEK-01	105002	435640	51.907	4.66063	Oil	Yes	Yes
LIR-45	75134	444647	51.9845	4.22456	Oil & gas	Yes	No
LIR-GT-01	79088	443732	51.9768	4.28232	Water	Yes	Yes
LIR-GT-02	79091	443735	51.9768	4.28236	Water	Yes	Yes
LSL-GT-01	94634	446401	52.0027	4.50809	Water	No	Yes
LSL-GT-02	94636	446408	52.0028	4.50811	Water	No	Yes
MKP-01	98895	451350	52.0476	4.56932	Oil	Partly	No
MKP-02	100484	450086	52.0364	4.59269	Dry	Partly	No
MKP-03	98581	450635	52.0412	4.56486	Oil	Partly	No
MKP-04	102113	446962	52.0085	4.61691	Oil	Partly	No
MKP-05	103933	444366	51.9853	4.6438	Oil	Partly	Yes
MKP-06	103936	444369	51.9854	4.64384	Dry	Yes	Yes
MKP-06-S1	103936	444369	51.9854	4.64384	Oil	Partly	Yes
MKP-08	98854	450944	52.044	4.56879	Oil	Yes	No
MKP-09	98849	450943	52.044	4.56872	Dry	Yes	No
MKP-09-S1	98849	450943	52.044	4.56872	Oil	Yes	No
MKP-10	98032	451845	52.052	4.55666	Oil	Yes	No
MKP-11	98034	451850	52.052	4.55669	Oil	Yes	No
MKP-12	98038	451858	52.0521	4.55675	Oil	Yes	No
MKP-12-S1	98038	451858	52.0521	4.55675	Oil	Yes	No
MKP-13	99685	449826	52.034	4.58108	Oil	Yes	No
MKP-14	97450	452330	52.0563	4.54809	Oil	Yes	No
MKP-15	97404	452374	52.0567	4.54742	Oil	Yes	No
MKP-16	96269	452703	52.0595	4.53081	Oil & gas	Yes	Yes
MLD-GT-01-S1	76055	440305	51.9456	4.23897	Water	Yes	Yes
MLD-GT-02	76050	440314	51.9457	4.23889	Failure	Yes	Yes
NLW-GT-01	76147	445237	51.9899	4.23917	Water	Yes	No
NMD-03	92650	419838	51.7637	4.484	Gas	Yes	Yes
OLE-01	87222	443813	51.9786	4.40067	Gas	Partly	Yes
PNA-01	87190	450590	52.0395	4.39886	Failure	No	Yes
PNA-02	86521	449436	52.029	4.38935	Oil	Partly	Yes
PNA-03	86902	449307	52.0279	4.39492	Oil	Partly	Yes
PNA-04	86111	449538	52.0299	4.38335	Dry	Partly	Yes
PNA-04-S1	86111	449538	52.0299	4.38335	Oil	Yes	Yes
PNA-04-S2	86111	449538	52.0299	4.38335	Dry	Partly	Yes
PNA-05	86789	449725	52.0317	4.39319	Dry	Partly	Yes
PNA-06	87135	449097	52.0261	4.39836	Oil	No	Yes
PNA-07	86768	449286	52.0277	4.39297	Oil	Partly	Yes
PNA-08	87538	449012	52.0253	4.40425	Dry	Partly	Yes
PNA-09	86116	449802	52.0323	4.38337	Oil	No	Yes
PNA-10	86707	449184	52.0268	4.39211	Oil	Partly	Yes
PNA-11	85913	450095	52.0349	4.38035	Dry	Partly	Yes
PNA-12	86703	449181	52.0268	4.39205	Dry	Yes	Yes
PNA-12-S1	86703	449181	52.0268	4.39205	Failure	No	Yes
PNA-12-S2	86703	449181	52.0268	4.39205	Failure	No	Yes
PNA-13	86517	449433	52.029	4.38929	Oil	Yes	Yes
PNA-14	86711	449186	52.0268	4.39216	Oil	Yes	Yes
PNA-15	84681	450095	52.0347	4.3624	Oil	No	Yes
PNA-GT-01	88758	448527	52.0211	4.42211	Water	Yes	Yes
PNA-GT-02	88754	448534	52.0212	4.42205	Water	Yes	Yes
PNA-GT-03	88612	447062	52.008	4.42027	Failure	No	Yes
PNA-GT-03-S1	88612	447062	52.008	4.42027	Failure	No	Yes
PNA-GT-03-S2	88612	447062	52.008	4.42027	Water	Yes	Yes
PNA-GT-04	88619	447064	52.008	4.42037	Water	Yes	Yes
STR-01	99659	419516	51.7616	4.58558	Gas	Yes	Yes
STW-01	95064	417589	51.7438	4.51936	Dry	Yes	Yes
VDB-GT-01	95241	447568	52.0133	4.51672	Failure	Yes	Yes
VDB-GT-01-S1	95241	447568	52.0133	4.51672	Water	Yes	Yes
VDB-GT-02	95243	447576	52.0133	4.51675	Failure	Partly	Yes
VDB-GT-02-S1	95243	447576	52.0133	4.51675	Water	No	Yes
VDB-GT-03	93045	448649	52.0227	4.48454	Water	Yes	Yes
VDB-GT-04	93288	448733	52.0235	4.48807	Water	Yes	Yes
WED-02	117124	422603	51.7908	4.83821	Oil	Yes	Yes
ZOM-01	92334	455047	52.0801	4.47301	Oil	Partly	Yes
ZOM-02	92646	454798	52.0779	4.47761	Oil	Partly	Yes
ZOM-02-S1	92646	454798	52.0779	4.47761	Oil	Partly	Yes
ZOM-03	94265	453648	52.0678	4.50143	Oil	Partly	Yes
ZOM-04	92707	454469	52.075	4.47856	Oil	Partly	Yes
ZOM-05	92712	454470	52.075	4.47863	Oil	Yes	Yes
ZOM-06	92592	455269	52.0822	4.47673	Oil	Yes	Yes
ZOM-06-S1	92592	455269	52.0822	4.47673	Water	Yes	Yes
ZOM-07	92839	455501	52.0843	4.48029	Dry	Yes	Yes
ZOM-08	92117	455492	52.0841	4.46976	Oil	Yes	Yes
ZOM-09	90345	456985	52.0973	4.44363	Water	Partly	Yes
ZOM-10	94275	453644	52.0678	4.50157	Dry	Yes	Yes
ZOM-10-S1	94275	453644	52.0678	4.50157	Failure	No	Yes
ZOM-10-S2	94275	453644	52.0678	4.50157	Oil	Yes	Yes
ZOM-12	92593	455264	52.0821	4.47675	Oil	Partly	Yes
ZOM-12-S1	92593	455264	52.0821	4.47675	Oil	Yes	Yes
ZOM-13	92647	454793	52.0779	4.47762	Oil	Yes	Yes
ZOM-14	93322	454523	52.0755	4.48752	Failure	No	Yes
ZOM-14-S1	93322	454523	52.0755	4.48752	Oil	Yes	Yes
ZOM-15	93321	454528	52.0756	4.4875	Oil	Yes	Yes
ZOM-15-S1	93321	454528	52.0756	4.4875	Oil	Partly	Yes
ZOM-16	92594	455259	52.0821	4.47676	Gas	Yes	Yes
ZOM-16-S1	92594	455259	52.0821	4.47676	Gas	Yes	Yes
ZOM-17	93862	454166	52.0724	4.49546	Failure	No	Yes
ZOM-17-S1	93862	454166	52.0724	4.49546	Oil	Yes	Yes
ZOM-18	93866	454164	52.0724	4.49552	Oil	Yes	Yes
ZOM-19	93871	454162	52.0724	4.49559	Oil	Yes	Yes
ZOM-20	91536	455391	52.0831	4.46131	Oil	Yes	Yes
ZOM-20-S1	91536	455391	52.0831	4.46131	Oil	No	Yes
ZOM-21	92118	455487	52.0841	4.46978	Failure	No	Yes
ZOM-21-S1	92118	455487	52.0841	4.46978	Failure	No	Yes
ZOM-21-S2	92118	455487	52.0841	4.46978	Oil	Yes	Yes
ZOM-22	92117	455497	52.0842	4.46976	Oil	Yes	Yes
ZOM-23	94977	453145	52.0633	4.5119	Dry	Yes	Yes
ZOM-24	91100	455644	52.0854	4.4549	Dry	Yes	Yes
ZOM-24-S1	91100	455644	52.0854	4.4549	Oil	Yes	Yes
ZOM-24-S2	91100	455644	52.0854	4.4549	Oil	Partly	Yes
ZOM-26	91537	455383	52.0831	4.46132	Oil	Yes	Yes
ZOM-27	91540	455378	52.083	4.46137	Oil	Yes	Yes
ZOM-27-S1	91540	455378	52.083	4.46137	Failure	No	Yes
ZOM-27-S2	91540	455378	52.083	4.46137	Oil	Yes	Yes
ZOM-28	93959	454085	52.0717	4.49689	Oil	Yes	Yes
ZOM-29	93964	454004	52.071	4.49697	Oil	Yes	Yes
ZOM-30	93968	454082	52.0717	4.49702	Oil	Yes	Yes
ZOM-31	93973	454080	52.0716	4.49709	Oil	Yes	Yes
ZOM-32	93978	454078	52.0716	4.49716	Oil	Yes	Yes
ZOM-33	92303	455056	52.0802	4.47256	Oil	Yes	Yes
ZOM-34	92310	455058	52.0802	4.47266	Oil	Yes	Yes
ZOM-35	91540	455374	52.083	4.46137	Oil	Partly	Yes
ZOM-36	91540	455369	52.0829	4.46137	Oil	Partly	Yes
ZOM-37	91541	455364	52.0829	4.46138	Oil	Yes	Yes
ZOM-38	93323	454518	52.0755	4.48753	Dry	Partly	Yes
ZOM-38-S1	93323	454518	52.0755	4.48753	Oil	Yes	Yes
ZOM-39	92115	455504	52.0842	4.46973	Oil	Partly	Yes
ZOM-40	91542	455359	52.0829	4.4614	Dry	Yes	Yes
ZOM-40-S1	91542	455359	52.0829	4.4614	Oil	Yes	Yes
